# Supplementary material for: Fast-response photothermal bilayer actuator based on poly(N-isopropylacrylamide)–graphene oxide–hydroxyethyl methacrylate/polydimethylsiloxane
Source: Royal Society of Chemistry journal article supplement (doi:10.1039/d3ra03213b), 2023-01-01
Supplement: d3ra03213b1.pdf [file d3ra03213b1.pdf]

(Electronic Supplementary Information)

**Fast-response photothermal bilayer actuator based on  
poly(N-isopropylacrylamide)-graphene oxide-hydroxyethyl  
methacrylate/polydimethylsiloxane**

Shun Li,<sup>a</sup> Zhuo Cai,<sup>a</sup> Jiemin Han,<sup>a</sup> Yifei Ma,<sup>\*a</sup> Zhaomin Tong,<sup>a</sup> Mei Wang,<sup>\*a</sup>  
Liantuan Xiao,<sup>a</sup> Suotang Jia<sup>a</sup> and Xuyuan Chen<sup>ab</sup>

*a. State Key Laboratory of Quantum Optics and Quantum Optics Devices, Institute of Laser Spectroscopy, Collaborative Innovation Center of Extreme Optics, Shanxi University, Taiyuan 030006, China. Email: wangmei@sxu.edu.cn*

*b. Faculty of Technology, Natural Sciences and Maritime Sciences, Department of Microsystems, University of Southeast Norway, Borre N-3184, Norway*

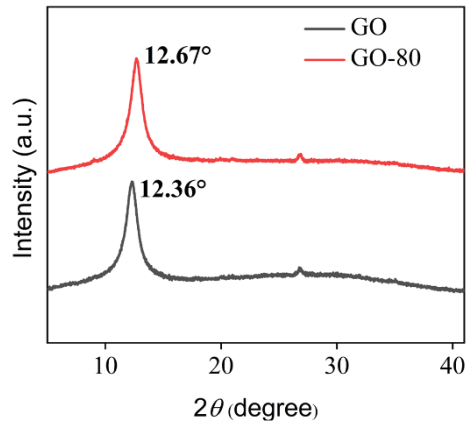

**Fig. S1** X-ray diffraction (XRD) spectra of GO and GO heated at  $80^\circ\text{C}$  for 2 h (GO-80).

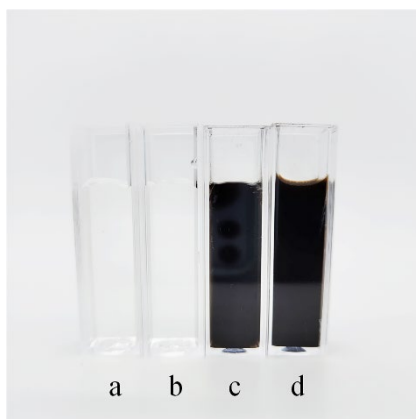

**Fig. S2** Digital photos of the Pure PNIPAM, PH, PGH-1 and PGH-2 hydrogels in the cuvette (from left to right). (a) Pure PNIPAM, (b) PH, (c) PGH-1, and (d) PGH-2.

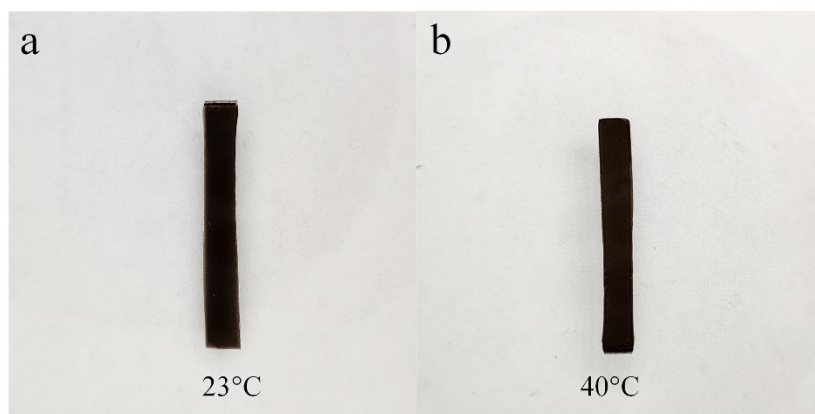

**Fig. S3** Photos of PGH-2 in room temperature and hot solution. (a) in room temperature water (25°C). (b) in hot solution (40°C).

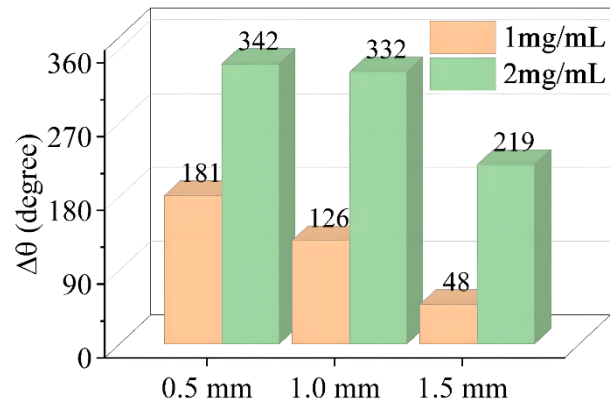

**Fig. S4** Comparison of thermo-responsive actuation behavior of the bilayer actuators with different GO concentration and different thickness of PNIPAM-based composite hydrogel films.
